# Supplementary material for: Extraction of Information on the Flooding Extent of Agricultural Land in Henan Province Based on Multi-Source Remote Sensing Images and Google Earth Engine
Source: MDPI journal article supplement (doi:10.3390/agronomy13020355), 2023-01-26
Supplement: s1 [file s1]

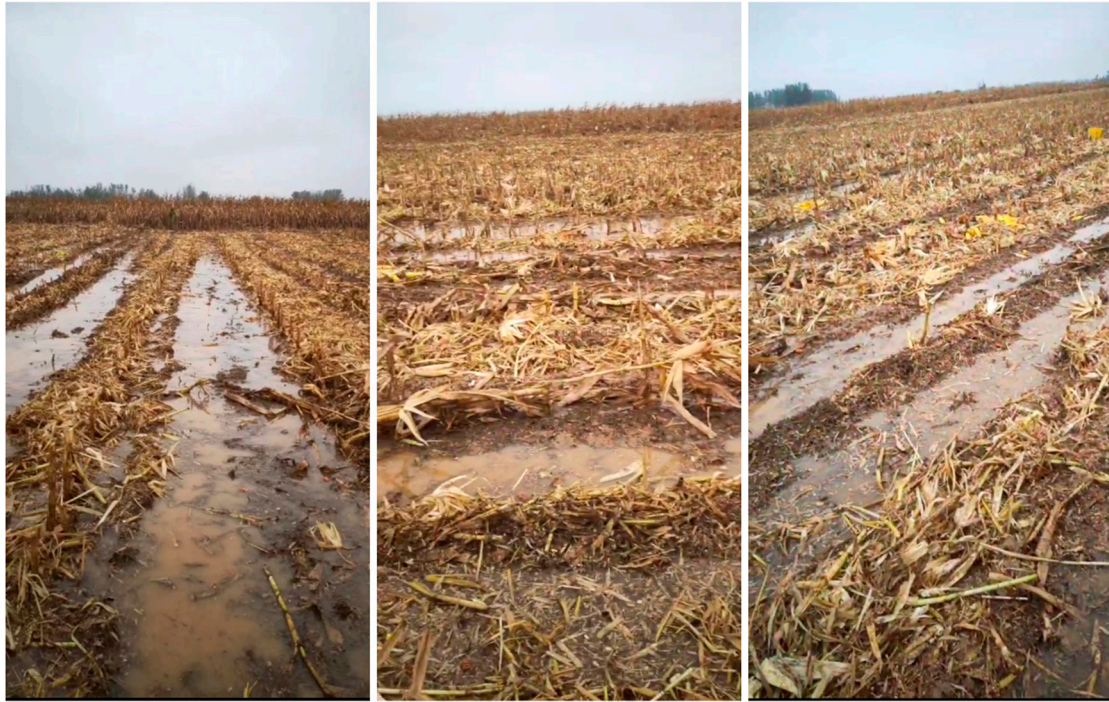

Figure S1. Field shot flood in crop lands of Henan Province after the “7.11” rainfall in 2021.

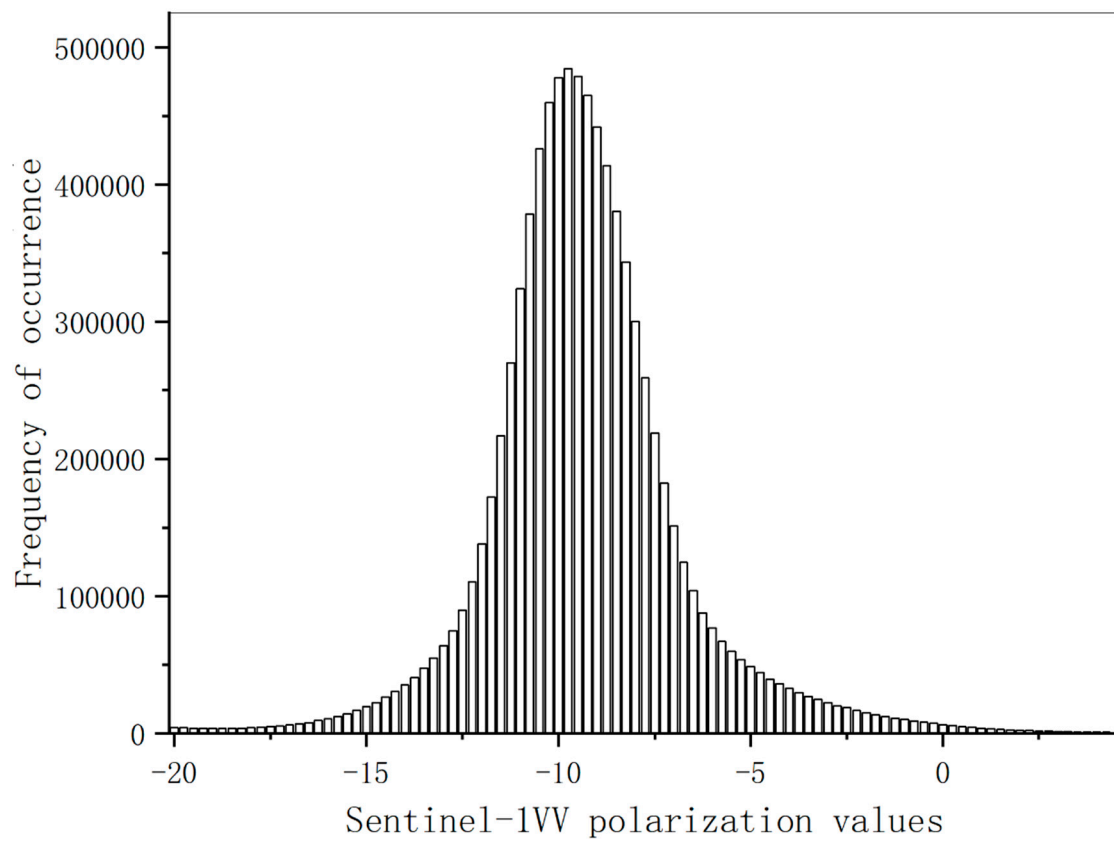

Figure S2. Histogram of Sentinel-1 VV images after flooding in Henan Province..

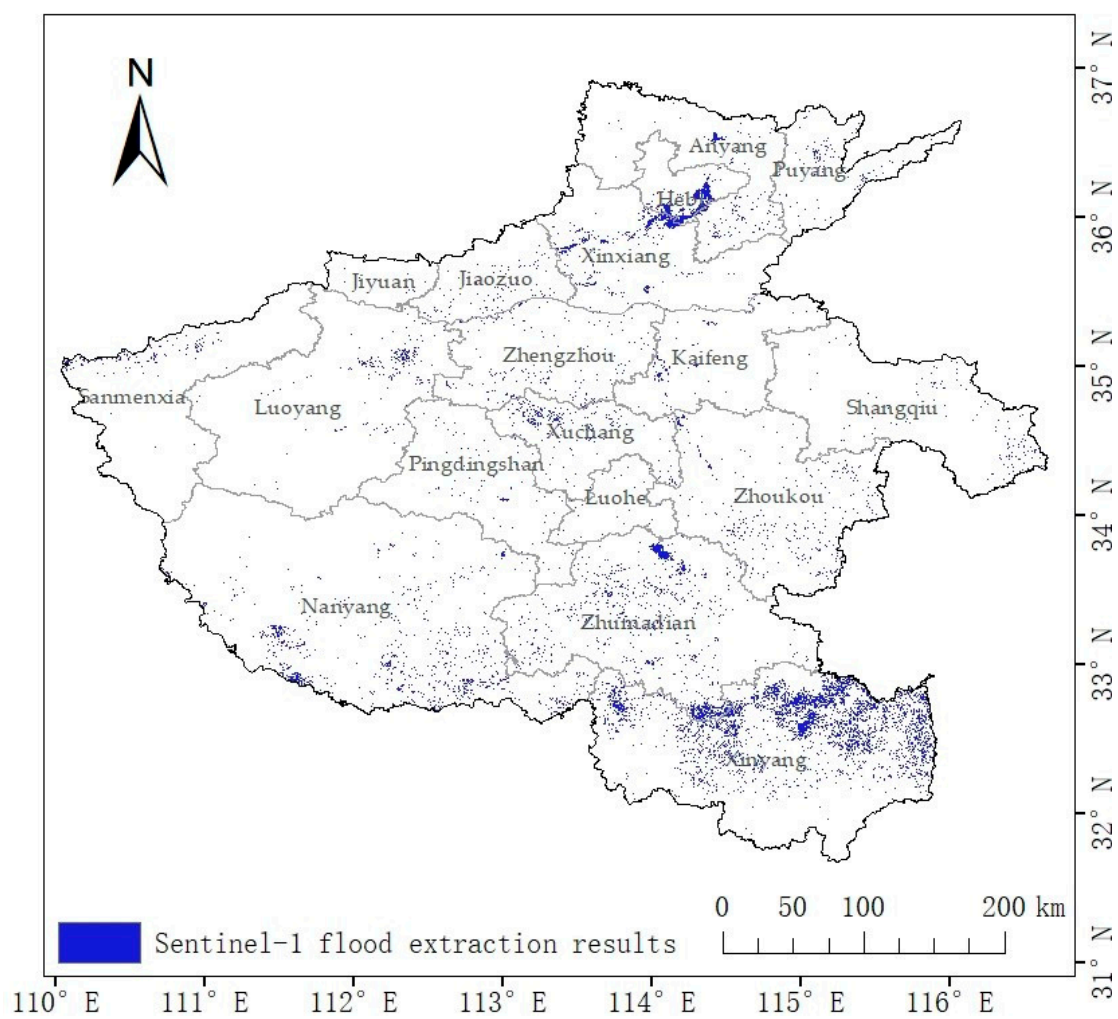

Figure S3. Flood region map that derived only from Sentinel-1 images.
